# Supplementary material for: Graph embedding-based novel protein interaction prediction via higher-order graph convolutional network
Source: PubMed Central journal article supplement (PMC7514053; doi:10.1371/journal.pone.0238915), 2020-09-24
Supplement: pone.0238915.s003.pdf [file pone.0238915.s003.pdf]

# Supplementary information: Graph embedding-based novel protein interaction prediction via higher-order graph convolutional network

Ze Xiao<sup>1</sup>, Yue Deng<sup>1\*</sup>

<sup>1</sup> School of Computer Science and Technology, Xidian University, Xi'an, Shaanxi, China

\* ydeng@xidian.edu.cn

**S1 Table. Detailed statistics of the datasets.**

| Datasets          | $N$   | $E$   | $D_{av}$ | $\rho$      |
|-------------------|-------|-------|----------|-------------|
| <b>HI-II-14</b>   | 4298  | 13868 | 6.212    | $1.45E - 3$ |
| <b>HI-III</b>     | 5604  | 23322 | 8.208    | $1.47E - 3$ |
| <b>Lit-BM-13</b>  | 5545  | 11045 | 3.663    | $6.89E - 4$ |
| <b>BioGRID</b>    | 12595 | 66542 | 10.313   | $8.19E - 4$ |
| <b>Bioplex</b>    | 10961 | 56553 | 10.319   | $9.42E - 4$ |
| <b>Hein et al</b> | 5457  | 28780 | 10.135   | $1.86E - 3$ |

Statistics of datasets, where  $N$  is the number of nodes(proteins),  $E$  is the number of edges (known interactions),  $D_{av}$  is average degree and  $\rho$  is the network density.

**S2 Table. Hyper-parameter setting, including candidate hyper-parameter values in grid search and default hyper-parameter values.**

| Hyper-parameter values                          | Candidate                                         | Default |
|-------------------------------------------------|---------------------------------------------------|---------|
| <b>hidden layer 1 dimensions</b>                | 64, 128, 256, 612                                 | 256     |
| <b>hidden layer 2 dimensions</b>                | 32, 64, 128, 256                                  | 128     |
| <b>hidden layer 3 dimensions</b>                | 16, 32, 64, 128                                   | 64      |
| <b>learning rate</b>                            | 0.001, 0.01, 0.02, 0.05, 0.1                      | 0.01    |
| <b>teleport probability <math>\alpha</math></b> | 0.01, 0.1, 0.2, 0.3, 0.4, 0.5, 0.6, 0.7, 0.8, 0.9 | 0.1     |
| <b>power iteration steps <math>k</math></b>     | 1, 2, 3, 4, 5, 6, 7, 8, 9, 10, 20, 30             | 10      |
| <b>co-training edges <math>t</math></b>         | 500, 800, 1000, 1500, 2000, 3000                  | 1500    |
| <b>dropout rate</b>                             | 0.1, 0.2, 0.3, 0.5, 0.8                           | 0.5     |

S3 Table. Overall link prediction performance comparison on six human PPI networks (AUPR). No. positive : No. negative = 1:1.

| Method Name           | HI-II-14        | HI-III          | Lit-BM-13       | BioGRID         | Bioplex         | Hein et al      | Mean |
|-----------------------|-----------------|-----------------|-----------------|-----------------|-----------------|-----------------|------|
| <b>HO-VGAE+CH2-L3</b> | <b>93.7±0.2</b> | <b>95.4±0.2</b> | <b>85.5±0.1</b> | <b>91.7±0.4</b> | <b>84.2±0.8</b> | <b>89.4±0.2</b> | 90.0 |
| <b>HO-VGAE+L3</b>     | <b>93.7±0.3</b> | <b>95.4±0.1</b> | 85.4±0.1        | <b>91.7±0.4</b> | 84.1±0.4        | <b>89.4±0.2</b> | 89.9 |
| <b>HO-VGAE</b>        | 93.5±0.3        | <b>95.4±0.1</b> | <b>85.5±0.2</b> | 91.6±0.3        | <b>84.2±0.6</b> | <b>89.4±0.2</b> | 89.9 |
| <b>VGAE+L3</b>        | 91.6±0.8        | 92.0±0.4        | 81.5±0.4        | 90.0±0.5        | 82.3±0.3        | 88.0±0.2        | 87.6 |
| VGAE                  | 90.6±0.7        | 91.7±0.6        | 79.1±0.4        | 89.8±0.2        | 81.8±0.7        | 87.2±0.5        | 86.7 |
| GraRep                | 90.0±0.3        | 90.3±0.4        | 77.6±0.4        | 88.8±0.7        | 77.0±0.6        | 87.3±0.3        | 85.2 |
| PA                    | 85.8±1.0        | 89.0±1.0        | 73.5±0.8        | 87.9±0.1        | 82.1±0.4        | 86.2±0.5        | 84.1 |
| SDNE                  | 88.2±0.7        | 87.9±0.7        | 77.1±0.5        | 87.2±0.7        | 76.2±0.6        | 84.8±0.6        | 83.6 |
| LINE                  | 88.9±1.0        | 89.3±0.9        | 76.5±0.4        | 84.7±0.6        | 73.6±0.3        | 83.0±0.6        | 82.7 |
| L3                    | 83.9±0.6        | 89.7±0.5        | 69.5±0.6        | 83.1±0.8        | 78.6±0.5        | 86.9±0.2        | 81.9 |
| CH2-L3                | 83.9±0.7        | 89.9±0.7        | 68.6±0.3        | 83.5±0.6        | 79.0±0.7        | 86.2±0.6        | 81.8 |
| HOPE                  | 85.3±0.8        | 86.0±0.9        | 73.6±0.9        | 83.6±1.0        | 69.1±1.5        | 83.9±0.7        | 80.3 |
| DeepWalk              | 84.5±1.3        | 84.9±0.7        | 65.9±0.9        | 82.1±0.3        | 73.5±0.7        | 77.1±0.6        | 78.0 |
| GF                    | 78.4±0.3        | 86.7±0.6        | 70.3±0.4        | 73.9±0.6        | 74.4±0.9        | 75.5±0.5        | 76.5 |
| node2vec              | 84.8±1.2        | 75.9±0.9        | 63.5±0.8        | 68.8±0.9        | 60.8±1.3        | 64.5±0.6        | 69.7 |
| CN                    | 65.3±0.9        | 69.9±0.7        | 63.1±0.6        | 66.2±0.5        | 63.5±0.2        | 73.9±0.4        | 67.0 |
| AA                    | 64.5±0.3        | 70.0±0.5        | 60.3±0.8        | 67.1±0.3        | 65.7±0.9        | 71.5±0.7        | 66.5 |

S4 Table. Overall link prediction performance comparison on six human PPI networks (AUPR). No. positive : No. negative = 1:10.

| Method Name           | HI-II-14        | HI-III          | Lit-BM-13       | BioGRID         | Bioplex         | Hein et al      | Mean |
|-----------------------|-----------------|-----------------|-----------------|-----------------|-----------------|-----------------|------|
| <b>HO-VGAE+CH2-L3</b> | 66.9±0.3        | 73.0±0.6        | 46.9±0.2        | <b>63.3±0.3</b> | <b>51.9±0.5</b> | 52.9±0.6        | 59.1 |
| <b>HO-VGAE+L3</b>     | <b>67.0±0.7</b> | 72.4±0.5        | <b>47.0±0.4</b> | <b>63.3±0.4</b> | <b>51.9±0.6</b> | 52.7±0.2        | 59.0 |
| <b>HO-VGAE</b>        | 66.8±0.5        | 72.3±0.3        | 46.9±0.3        | 63.1±0.2        | 51.8±0.2        | 52.1±0.1        | 58.8 |
| CH2-L3                | 61.9±0.5        | <b>73.4±0.3</b> | 37.9±0.7        | 59.1±0.3        | 50.6±0.7        | <b>63.8±0.8</b> | 57.0 |
| L3                    | 62.4±0.5        | 69.1±0.6        | 39.4±0.5        | 56.3±0.6        | 49.8±0.3        | 60.6±0.2        | 56.3 |
| <b>VGAE+L3</b>        | 64.9±0.2        | 68.2±0.2        | 36.1±0.7        | 60.6±0.6        | 47.6±0.4        | 50.6±0.7        | 54.7 |
| VGAE                  | 63.7±0.7        | 67.7±0.1        | 35.5±0.2        | 59.9±0.5        | 46.5±0.7        | 49.1±0.2        | 53.7 |
| GraRep                | 56.3±0.3        | 60.5±0.3        | 34.9±0.4        | 57.1±1.0        | 50.2±0.6        | 41.9±0.2        | 51.2 |
| LINE                  | 49.3±0.7        | 51.4±0.7        | 31.1±0.8        | 51.2±0.2        | 48.6±0.4        | 41.1±0.8        | 45.4 |
| PA                    | 56.5±0.8        | 62.4±0.8        | 30.1±0.4        | 46.3±0.7        | 41.2±0.6        | 46.4±0.4        | 47.2 |
| HOPE                  | 53.1±0.7        | 56.4±0.9        | 31.0±0.6        | 50.6±0.2        | 43.3±0.8        | 37.3±0.9        | 45.3 |
| SDNE                  | 48.1±0.4        | 49.6±0.4        | 30.1±0.4        | 47.2±0.1        | 46.3±1.0        | 39.6±0.3        | 43.5 |
| GF                    | 45.2±0.5        | 50.4±0.5        | 24.1±0.3        | 39.2±0.7        | 37.9±0.5        | 26.0±0.4        | 41.3 |
| DeepWalk              | 37.9±0.7        | 49.3±0.4        | 17.0±0.4        | 37.5±0.8        | 36.2±0.2        | 33.6±0.5        | 35.3 |
| CN                    | 29.5±0.8        | 35.4±0.9        | 27.8±0.5        | 29.7±0.4        | 28.3±0.8        | 42.8±0.5        | 32.3 |
| AA                    | 28.8±0.2        | 37.3±0.5        | 23.5±0.5        | 30.8±0.9        | 30.5±0.2        | 41.7±0.6        | 32.1 |
| node2vec              | 30.7±2.0        | 42.1±0.8        | 13.5±0.6        | 33.2±0.8        | 33.2±0.9        | 30.1±0.5        | 30.5 |

S5 Table. Hadamard product based and concatenation based graph embedding performance (AUPR). All unknown pairs were treated as negative examples.

| Method Name | category         | HI-II-14 | HI-III  | Lit-BM-13 | BioGRID | Bioplex | Hein et al | Mean |
|-------------|------------------|----------|---------|-----------|---------|---------|------------|------|
| GraRep      | Hadamard product | 2.0±0.3  | 2.4±0.0 | 1.0±0.0   | 1.5±0.1 | 1.4±0.1 | 0.9±0.1    | 1.5  |
| GraRep      | Concatenation    | 2.0±0.2  | 2.3±0.1 | 1.0±0.1   | 1.6±0.1 | 1.6±0.0 | 0.9±0.1    | 1.6  |
| SDNE        | Hadamard product | 1.0±0.1  | 1.0±0.0 | 0.5±0.0   | 1.2±0.1 | 1.0±0.0 | 1.2±0.0    | 0.98 |
| SDNE        | Concatenation    | 1.1±0.2  | 1.0±0.1 | 0.5±0.0   | 1.3±0.0 | 1.0±0.0 | 1.2±0.0    | 1.0  |
| LINE        | Hadamard product | 1.2±0.0  | 1.1±0.0 | 0.6±0.0   | 1.1±0.1 | 1.2±0.0 | 0.7±0.0    | 0.98 |
| LINE        | Concatenation    | 1.2±0.0  | 1.1±0.0 | 0.6±0.0   | 1.1±0.0 | 1.2±0.0 | 0.7±0.0    | 0.98 |
| GF          | Hadamard product | 1.3±0.1  | 1.7±0.3 | 0.4±0.0   | 0.9±0.1 | 0.5±0.0 | 0.5±0.0    | 0.88 |
| GF          | Concatenation    | 1.4±0.2  | 1.7±0.2 | 0.4±0.0   | 0.6±0.0 | 0.9±0.0 | 0.5±0.0    | 0.92 |
| DeepWalk    | Hadamard product | 1.0±0.0  | 1.8±0.1 | 0.2±0.0   | 1.2±0.3 | 0.8±0.0 | 0.6±0.0    | 0.8  |
| DeepWalk    | Concatenation    | 1.0±0.1  | 1.8±0.1 | 0.2±0.0   | 1.0±0.1 | 0.8±0.1 | 0.8±0.0    | 0.93 |
| node2vec    | Hadamard product | 0.9±0.0  | 1.5±0.2 | 0.2±0.0   | 1.0±0.1 | 0.8±0.1 | 0.6±0.0    | 0.87 |
| node2vec    | Concatenation    | 0.8±0.0  | 1.5±0.1 | 0.2±0.0   | 1.0±0.0 | 0.7±0.0 | 0.8±0.0    | 0.80 |

S6 Table. Hadamard product based graph embedding performance (Precision@k).

| Method Name | category         | HI-II-14 | HI-III   | Lit-BM-13 | BioGRID | Bioplex | Hein et al | Mean  |
|-------------|------------------|----------|----------|-----------|---------|---------|------------|-------|
| GraRep      | Hadamard product | 12.0±0.3 | 13.6±0.6 | 7.9±0.3   | 9.9±0.1 | 9.2±0.1 | 10.6±0.2   | 10.53 |
| GraRep      | Concatenation    | 12.6±0.1 | 13.6±0.6 | 7.9±0.3   | 9.8±0.3 | 9.2±0.1 | 10.6±0.2   | 10.86 |
| LINE        | Hadamard product | 10.6±0.4 | 10.5±0.3 | 6.2±0.2   | 8.1±0.1 | 8.2±0.1 | 9.2±0.1    | 8.80  |
| LINE        | Concatenation    | 11.4±0.2 | 11.0±0.1 | 6.1±0.3   | 8.5±0.3 | 8.6±0.3 | 9.1±0.3    | 9.11  |
| SDNE        | Hadamard product | 8.0±0.1  | 10.1±0.4 | 3.9±0.1   | 7.0±0.2 | 7.2±0.3 | 7.3±0.0    | 7.25  |
| SDNE        | Concatenation    | 8.5±0.3  | 10.2±0.2 | 4.1±0.2   | 7.1±0.1 | 7.4±0.1 | 7.6±0.2    | 7.48  |
| GF          | Hadamard product | 7.3±0.4  | 6.8±0.3  | 7.7±0.2   | 4.7±0.2 | 4.4±0.1 | 7.0±0.4    | 6.33  |
| GF          | Concatenation    | 7.7±0.2  | 6.9±0.2  | 7.7±0.5   | 5.1±0.3 | 4.4±0.1 | 7.3±0.1    | 6.51  |
| DeepWalk    | Hadamard product | 6.5±0.0  | 8.3±0.1  | 3.4±0.0   | 4.7±0.0 | 6.1±0.1 | 5.6±0.0    | 5.76  |
| DeepWalk    | Concatenation    | 6.7±0.3  | 8.9±0.1  | 3.3±0.1   | 5.0±0.2 | 6.0±0.1 | 5.8±0.2    | 5.95  |
| node2vec    | Hadamard product | 4.9±0.2  | 8.1±0.3  | 1.6±0.1   | 3.0±0.2 | 5.3±0.4 | 4.3±0.3    | 4.45  |
| node2vec    | Concatenation    | 4.8±0.4  | 8.5±0.3  | 1.5±0.0   | 3.1±0.2 | 5.3±0.4 | 4.3±0.3    | 4.58  |

S7 Table. Link performance with and without using DeepWalk to generate node features (AUPR). All unknown pairs were treated as negative examples.

| Method Name | category         | HI-II-14 | HI-III  | Lit-BM-13 | BioGRID | Bioplex | Hein et al | Mean |
|-------------|------------------|----------|---------|-----------|---------|---------|------------|------|
| HO-VGAE     | With DeepWalk    | 4.5±0.1  | 5.6±0.4 | 2.4±0.1   | 5.5±0.1 | 4.6±0.0 | 1.6±0.17   | 4.03 |
| HO-VGAE     | Without DeepWalk | 4.7±0.3  | 5.1±0.2 | 2.4±0.0   | 5.7±0.2 | 4.7±0.1 | 1.6±0.0    | 4.10 |
| VGAE        | With DeepWalk    | 3.5±0.1  | 4.7±0.3 | 1.4±0.0   | 4.7±0.1 | 3.6±0.0 | 1.3±0.1    | 3.18 |
| VGAE        | Without DeepWalk | 3.4±0.1  | 4.4±0.1 | 1.4±0.1   | 4.6±0.2 | 3.7±0.1 | 1.3±0.1    | 3.13 |

S8 Table. Link performance with and without using DeepWalk to generate node features (Precision@k).

| Method Name | category         | HI-II-14 | HI-III   | Lit-BM-13 | BioGRID  | Bioplex  | Hein et al | Mean  |
|-------------|------------------|----------|----------|-----------|----------|----------|------------|-------|
| HO-VGAE     | With DeepWalk    | 17.0±0.3 | 18.5±0.3 | 10.9±0.2  | 10.3±0.1 | 12.5±0.6 | 12.1±0.5   | 13.55 |
| HO-VGAE     | Without DeepWalk | 17.7±0.1 | 18.5±0.4 | 10.6±0.5  | 10.4±0.3 | 12.4±0.3 | 12.8±0.3   | 13.70 |
| VGAE        | With DeepWalk    | 15.5±0.6 | 16.0±0.1 | 8.9±0.5   | 9.1±0.2  | 10.3±0.2 | 10.7±0.6   | 11.75 |
| VGAE        | Without DeepWalk | 15.2±0.4 | 16.6±0.3 | 8.9±0.2   | 9.0±0.2  | 10.1±0.3 | 11.2±0.4   | 11.83 |
